# Supplementary material
Source: publisher site journal article supplement (https://zookeys.pensoft.net/article/6185/download/suppl/32/)
Supplement: Supplementary file 1

## Faunistic Note
